# Supplementary material for: Reconstruction of regulatory and metabolic pathways in metal-reducing δ-proteobacteria
Source: PubMed Central journal article supplement (PMC545781; doi:10.1186/gb-2004-5-11-r90), 2004-10-22

## DESCRIPTION OF ADDITIONAL DATA FILES

Supplementary Fig. 1. (A) The thiamin-specific regulatory *THI* elements in  $\delta$ -proteobacteria. *THI* elements are in bold with conserved sequence regions in red and conserved helices marked by background gray, yellow, green and blue colors. Regulatory hairpins (terminators) are marked by background magenta with poly-T regions in blue. Start codons and ribosome-binding sites are in blue and underlined.

DD\_THIS  
**CAGCTA** **GGTGCCCGTACGGCTGAGATTGAAACAGGTGTTCTGA** **CTTGGAACTGATGCGGGTAACCGCCGTAGGGAAGCTG**GCAGACATATCATACATATGC**AGCCGGCCTGAGCC**  
**GGCTTTTTTT**GTATGTATGACCAGGGCCGTATGCGCCAGT**CGTG** **GGGCTTGTCAAGCTGAGATTGAAGCGCAAAGCTTCTGA** **CTTGGAACTGATGCAATTAACTGCGCAAGG**  
**GAGCC**CATGATATTTTCATTGCGGAAATGCT**CGGCTTGTCTTT**CGGGCAGGCC**CTTTTTTT**TATGTCGGATGTATGAAAGACAGCAGCGCCGCCCGCCGGAGATTCCGGCGTTGCCGG  
ACGCTGGCCCTGTCCGGTGCAGAAC**AAAAGCCGGAACAATGA**ACATCA

DV\_THIS  
**TCAGCTA** **GGGAGCCTTCGGCTGAGAGTGGGCACGTCCCAGA** **CTTGTGAACCTGACCGCAGTTTACACTGCGT**AGGGAAGCTGAGCCCGGACAACGTCCGTT**CGCCATCC**TCTGCGGA  
**TGGCTTTTTT**GTTTTTCGAGTATCAGCGGTGCGCGTCCGACCGGAG**CTA** **CTTGGAACTGATGCGGGTACCGGCGT**AGGGAAGCTGAGCCCGGACAACGTCCGTT**CGCCATCC**TCTGCGGA  
**GAGCC**CGCCACCCGACATGCGTCCGT**ACGCCATCC**TCTGCG**GATGGGGTTCTGTTTTT**CCGGCCCGCCGATCCGCTTTGCGCCCTGCTCGACTATGGCGGCAGGCAGGCGGGG  
CGGTCCGGCCTTGGCAGCGCTCAGCAGACAACCCCGCAGAA**GAGAGA**CGGGC**ATG**ACGATAG

DA\_THIF  
**GCCCTG** **GGGAGT**TTATT**ACTGAGAGT**CTCTGTTGCGGGACGA**CTT**TAGAA**CTGATCCGGT**TATACCGGCGT**AGGGAAGCC**ACTTTATACGGGATTTCTCCGTCG**AGGTCGC**TTTC  
**CGGACCTTTTTCTATTTT**GGATCCAAGAGCACTTTCCGCTCACCAATGTGTC**ATG**ATTATCG

DA\_THIE  
**ATGCTGCTG** **GGGAGT**GATT**CACTGAGAG**CTCTGTTAGATTGGAGCGA**CTT**TGGAA**CTGATCCGG**ATTATACCGGCGT**AGGGAAGCGACCTGACAA**ACCAGT**ATG**GTGTTTCG direct  
sequstration of the ribosome-binding site (regulation of translation)

GM\_THIE  
TTGACTTAACGGGAAAATTCGGTTAGCTTTGTCTACACAAAAGCAGC**CTGCTG** **GGGAGT**TCTT**CGAGA**ACT**GAGAC**GGGCACCGCCCGAA**CTT**TACCA**CTGATCCGG**GTAATG**CCGGC**  
**TAGGGAAGCCG**CCAGAGACCTCGTTTACCTCGTTGAGTTCTGGG**ACCGT**GACATC**GTCACGGT**TTTTTTGTTTGGGAGATCACC**ATG**GGCAGCA

GM\_THIS  
**CGCTA** **GGGAGT**TTTC**ACTGAGAG**TCCGACGCGCTGCTACCGACAA**CTT**TGAA**CTGATCCGG**AATA**CCGGCGT**AGGGAAGCGTTCCACCATGTTCTATTCCAGACCAG**GGCCGCT**  
TCT**CGGCTTTTTT**GTTTACCGACAGATGCCGGTTTCGACGAACCGGCACCCATACT**CGGAGA**ACACA**ATG**GAAATCA

GS\_THIE  
**CTGCTG** **GGGAGT**TCTTGG**GA**ACT**GAGAC**GGGCACCGCCCGAA**CTT**TGAA**CTGATCCGG**TATACCGGCGT**AGGGAAGCGG**CCAGAAACAATCATCCGTACGTCTTTTCTGGAA**CCGC**  
**GAC**TTTGCC**GTCGCG**TTTTTTTT**GAGGAGA**TTTCCTTTC**ATG**GCCTCT

GS\_THIS  
**CGCTA** **GGGAGT**TTTC**ACTGAGAG**CGCCGTCTGTATGCCGTTCCGACCGCCCGGATAACAGGGAATAACCGGCACGGAGCGGCAGGGCGA**CTT**TCAA**CTGATCCGG**GTAATACCGG  
**CGTAGGGAAGCC**ATAGAACATGGATCACCACAACCCATG**GGCCG**TTCT**CGGCTTTTTT**GTTTACACAACCCACCGTATCCCGACAGGAGGCC**ATG**AAC

DP\_THIM  
TTTTTGCA**CTG**TGGCTTTAGGG**CTGAGA**AGATA**CCG**ATT**GAACTGACCTGG**CTAAA**CCAGG**TAGGGAAT**TGCAGAAA**TGTCCTCATTTTCATTTCTCGCTCTATC**TGCTCGC**CTC  
CCCC**TGTTA**TTCT**AGCGAAA**CTT**TAACA**TTTATCC**CTCAGTA**ATGTTATGTGCA

(B) Conserved structure of the *THI* element.

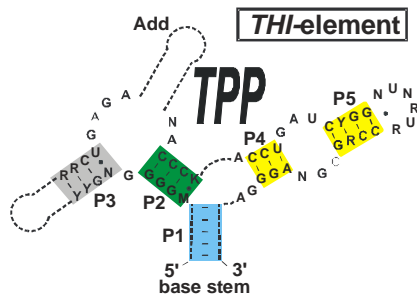

Supplement Fig. 2. (A) The vitamin B12-specific regulatory RNA elements in  $\delta$ -proteobacteria. *B12*-elements are in bold with conserved sequence regions in red and conserved helices marked by background sea green, gray, yellow, green, cyan and blue colors. Regulatory hairpins (terminators or sequestors) are marked by background magenta with poly-T regions in blue. Start codons and ribosome-binding sites are in blue and underlined.

GM\_CobU  
**TCAAT**GTCTTTTGCCTCATGGCAGAA**AG**GTAA**AGGGAA****AGGGT**GCGACT**CCCTT**GC**CCC****ACTGTGA****ACGG**TGATGAAAGCCGCAACGAT**CCGACTG**ATCTGGTTTCCATGATGAA  
 ACC**CGGAA****GGC**GCGCGAGTAAAGT**CCGT****GAGCCAGGAAACCTG****CTTGA**CGTCAGCTTACAGGACCTCCGTGGAAAGAGGCTCCGAGGCCCGGGCTTCGGCTTTTACCGGTTTTT**G**  
**GACCCCGCTTCC**CTT**CA****GGAGGCGGGCTTTT**CATTT**ATG** terminator/sequestor

GS\_CobU  
**GTTCA**GTCTTCCACTCCCACGGT**GGA**GTAA**AGGGAA****AGGGT**GGAAT**CCCTT**GC**CCC****ACTGTGA****ACGG**TGATGAAAGCCGCAACGAT**CCGACTG**GAGAGTCTTGTGATGTG  
 AAGCGGTGAAATACGCCTTCTT**CGGAA****GGC**GCGCG  
 AGTAAAGT**CCGT****GAGCCAGGAAACCTG****CTTGA**CGATGAGCAGCGCTCCGAGGAAGAGGTGCCAAGCCATCGTCAATTATCCACGGTATT**CGA****GCCCCGCCCT**TGTC**AGGAGG**  
**CGGGT**TTTT**CATT****ATG** terminator/sequestor

GS\_CbiM  
**CCTTC**GTCTTCAAGGAA**ACCGT****GCA**AT**ACCGT**GC**CCC****ACTGTGA****GGGG**GGACCGATGCCCGAGT**GAT****CCGACTG**TCCGAAGGGA**GGGAA****GGC**GCGCAGCGGGATGAT**CCC**  
**GAGCCAGGAGACCTG****CTTGA**AGG  
 CGACAACACTCCGACCGAGGGGAAGGGAGTTGTATGGGAGCAGAGCATATCCAC**TGG**GG**CTATGAGGT**CGTTCGGCAGCGAGGGCAAGAACGGGACGGATCATA**ACTTCATAG****GG**  
**AGCA**CGCA**ATG**AAACGAA sequestor?

DD\_CbiK  
**ATTCA**GTCTTGCCTGCGG**GGT**TGATAGGAA**TCCCGT**TAAAGT**CGGGAG****GG**ACCCG**CG**CGTAA**GTCC**ACGATACCGCGATCCACACCGT**CCGACTG**GGAAAAAT**TCC****CGGAA****GGC**CG  
 GATCCCGCG**GGACA****AGCCGGAAGACCTG****CTGAGT**GTACAGGATGACTTTTGGCACGGGGCTTTGCCGCAAAAAGTCCGTACCGGTGAC**CGAGCGC**CTT**CCCTG**CCAT**G**CAGGAGGC  
 A**CGCTCT**TTATTTTACCCTGACTATATCAATGCCCCAGATTCTCT**GGAGG**TTTCTT**ATG**AAACTGC terminator

DV\_CbiK  
**ACCATC**GTCTTGCCCTGAGC**GGT**TGATAGGAA**TCCCGT**TGAAT**CGGGAG****GG**ACCCG**CG**CGTAA**GTCC**ATAAAAGACCTTCTCCCCGT**GAT****CCGACTG**GACGACCGTC**CGGAA****GGC**  
 CGGAGCAGGT**CGGT****GAGCCGGAAGACCTG****CTTGA**CGATGCCATGCCGGGACAAACGGGGCTTTTGTCCGACCGGGCCACGGTGGCGACCCGACACATGCCCGCGCCGGCGCG  
 AGCCCTGTGGTATCCGTCCTCGCTCCACGCCAATTGCCCGC**CAACCTC**CT**GAGGTTG**CCAT**ATG**TCTGCC sequestor

DV\_NrdDG  
**GTTCG**TTTCGGGAA**TCCGGT**GCGAGT**CCGGAG****CG**CTCCG**CG**CTGT**CA**CC**TG**CGCCTCGGGCCACGCCACAGCCATGAA**CCGACTG**CCCCCTGCGGG**GGGAA****GGC**GGTTGTGAGT  
**GGGAGAGCCAGAATACCGGG****CGGAG**CAGTCTCGATCCCTCGTTGCACCGGATGTACCGGGGTTACGCCATTCCACATTTCGGGTGCGGTGCGAGCTTCCGACGTCGACCCGTGC  
**TCCGACCGCA**GTCCCGCC**GT**TGCCAT**ACGGG**GTCCCG**CGGT**CTT**GCGTGC**CC**GGAG**CCAAGCATCT**ATG**CCCAAGAAGATT sequestor

DA\_NrdDG  
**GGATCA**GTCTTGCCCAACGGGAGCTTAAATGTCTCGTGA**GGT**TGATAGGAA**AGGGT**GCA**ACT**CC**CG**CG**GG**ACCCG**CG**CTGTAA**ACGT**GGACAACAGGCTCCAT**CCGACTG**GTTCGA  
**CGGAA****GGC**GCCTGAAGGATGA**AGCGT****AGCCGGAAGACCTG****CTTGA**CTCCAACTCAATGATTTCTCGTGGTAAAGGGAGAGTGACGCATCGATCCGATTTTAAATACCG**GAAGTCCG**  
**CAGGAGC**TTTGGCCCTT**GCGGACT**TTT**GT**GTTTCCGGTGCAGACTGTCTCTGTGCCGGGTTTAACTGAT**AGGAG**CAGT**CGATG**CCAGAGAC terminator

DA\_BtuBCDF  
**GTCCAC**GTCTTGCCCGCC**AGGGT**AAAAGGGAA**AGGGT**TGCA**AT**CC**CG**CG**GG**ACCCG**CG**CTGTAA**ACGT**GACGAAGGGTTGACAG**CCGACTG**GCCGCTTGGC**GGGAA****GGC**AACCCCG  
 AGGATGAT**TCGG****AGCCAGGAGACCTG****CTTGA**CTGACACACCACATTGACTCCCGGGAAACAGGGAGAGTGGAGATTAGCGCGCTTCAAATACGGGAAGCCCGCGACCTATT**TA****GG**  
**CTCCCGGGC**TTTT**TG**CGTTGAAGCGGTCCCTTTTCGCCATTTTCGTTCCGGGCAAAA**GGAGAA**ATTCC**ATG**AAGAAACA terminator

DA\_BtuB2  
**GTTCG**TTTGTGCAAC**CAAT**AGGAA**TCCGT**GAA**AT**CGGGAG**GG**GCCCG**CG**CTGTAA**ACGT**GACGATCAACACATTT**CCGACTG**ACTTAGAGT**GGGAA****GGC**GTGTGTA  
 GACGGAAGAT**CTGG****AGCCAGAAGACCTG****CTTGA**AA**CG**CAATGTTGCACTTTCTGTCCGAAAGTTGAAGCAATAAAGTATCACGGGAGATATGGGAT**ACCCCGGAT**CGAT**TTTGT****TAT**  
**CGGTTCGGGG**TTTT**TG**CGCTCCGGACACAAACCTGT**AGAGC**TTGT**ATG**AAGAAGA terminator

DA\_BtuB3  
**ATTCA**GTCTTGCCTCAC**GAGT**TAA**AGGAA****CCCTG**TGTA**AT**CGGGAG**GG**GCCCG**CG**CTGTAA**ACGT**GAGGAGCAAAAGCCGCTT**GAT****CCGACTG**CCGAAAT**TCGG****GGAA****GGC**GTGGCC  
 GGTAGGATGAT**CCGA****AGT**CAGAAG**ACCTG****CTTGA**AA**CG**CAATGTTGCACTTTCTGTCCGAAAGTTGAAGCAATAAAGTATCACGGGAGATATGGGAT**ACCCCGGAT**CGAT**TTTGT****TAT**  
**CTCTGGGAT**TTTT**TG**CGCCGGACCCAGGAAGATTTTGG**AGGAG**CGTACCC**ATG**AAAACAAT terminator

DP\_CbiK  
**TGTT**GTCTTGCCTTGGTAAAGGTT**AGCT**TAA**AGGAA****TCCGT**TGA**AT**CGGGAG**GG**GCCCG**CG**CTGTAA**ACGT**GGGACA**ACT**CTGCATTAT**GTCA****CTG**AACGTTTGT**T**  
**GGGAA****GGC**GCAGAAGAAGGATGAT**CCGA****AGT**CAGAAG**ACCTG****CTTGA**AA**CG**CAATGTTGCACTTTCTGTCCGAAAGTTGAAGCAATAAAGTATCACGGGAGATATGGGAT**ACCCCGGAT**CGAT**TTTGT**  
 ATTTT**CT**CCGG**GG**CTCTGTTC**CCG**GACTTT**AG****TG**CACT**GT**GGCT**GTG**TTTGTGCATCC sequestor

(B) Conserved structure of the *B12*-element.

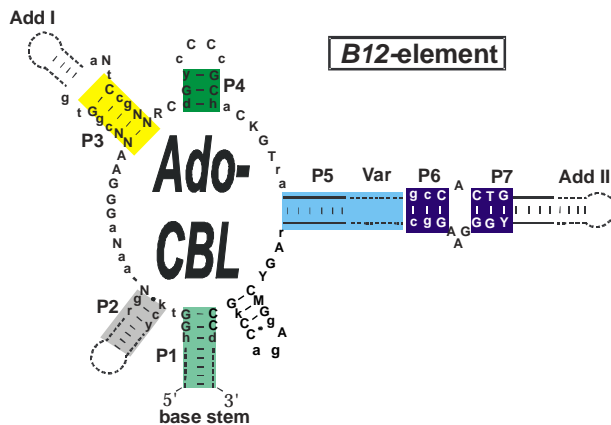

Supplementary Fig. 3. (A) The SAM-specific regulatory RNA elements (S-boxes) in  $\delta$ -proteobacteria. S-boxes are in bold with conserved sequence regions in red and conserved helices marked by background green, yellow, blue and gray colors. Regulatory hairpins (terminators) are marked by background magenta with poly-T regions in blue. Start codons and ribosome-binding sites are in blue and underlined.

GS\_metX  
**CCTCTTATCAAGAGTGGTGGAGGGAAAAGGCCCTGTGAAACCCAGCAACCGGTCCGGTAGCGGACGCAGGTGCTAAATCCTGCCGAAAAGGGAGCATGAGA**GGGAGCCTTGTGACCACCACGCGTACA  
**GGCCCTTCCGTTTCCGGGAGGGGGCTTTCATTTCGCCGCCGCGGCAACGCCCCGTGGGGAATCATG**

GS\_MET1  
**TTTATTAAGAGCGACCGAGGGACAGGCCGGTGAAGTTCGGCAACTCCCCATGGGGGGAAGGTGCCAATCCTGCGAGACCACAGGTTTCGGGAAATAG**GAAGAGCGTGACACCTCACGGTGAATCG  
**AAATCCTTCCGCACCCCGGAAGGGGATTTTTTCATTGTGGAGGAAACCATG**

GM\_MET1  
**TTTATTAAGAGCGACCGAGGGACTGGCCCTATGACGTTCGGCAACTCCCCCAAGGGGACGGTGCCTAAATCCTGCGAACGGCAACGTTCCGGGAATATAGAA**GAGCGTTGCCCGCTAACGGCC  
**AAATCCTTCCGCACCCCGGAAGGGGATTTTTTCATTGTGGAGGCAAAAACCCATG**

GM\_METX  
**TTCTTATTAAGAGTGGTGGAGGGAAAAGGCCCTGCGAAGCCACAGCAACCGGTCTTCCGGTTCGCATTTCGAGCACGAAGGCGAACCGGAAAGTGAACAGGTGCTAAATCCTGCCGGAAGGCAAAATAGCAAC**  
GGCGCTTGACGATAGCCACAACGTCAACAAAGCCCTTCTCGCCACCSCGGGAAGGGGGTTTTGTTCGGAACCATTTATTCAGGATTGACGCATG

DA\_METX1  
**CCGTTTATTAAGAGTGGTGGAGGGAAATGCCCTTTGAAACCCAGCAACCGTCCCTGACGTTTCAGGATGACAGGTGCTAATCCACCCCGCAAGGGGACAATATAGACCG**CGTCTTTGGATCTTGATC  
CACCACAGGACGTTTCTTCTGTTCACGATCCACAAAGCCCCATTCCTCTGGATGGGGCCTTTTTCGCTGGAGAGAAATTTG

DA\_METX2  
**CGTCTTATTAAGAGTGGTGGAGGGAAAAGGCCCTGTGAAACCCAGCAACCGATCCGCAGATGGGATGCCAGGTGCTAATCCTGCCCTGTAAACAGGGACAATATAGACCG**GAGCCCGAAAGATACGGCC  
TTATCTTTCCCGTATCGTCAGGCCCTTCTGTACCCCTGGGAGGGGCTTTTACGTCAAGGGTGTGCGCGTTG

DA\_MET1  
**CGTCTTATTAAGAGTGGTGGAGGGACAAGGCCGACGAAGCCACAGCAACCGATCCGCAGGTTCGGATGCCAGGTGCTAATCCTGCCCTGTAAACAGGGACAATATAGACCG**GTCTTTCCCGTATCGTCAGGCCCTTCTGTACCCCGAAGAGGGGCTTTTCTATGCCGCCACAGACCTTGACGAGGATGACCCATG

(B) Conserved structure of S-box.

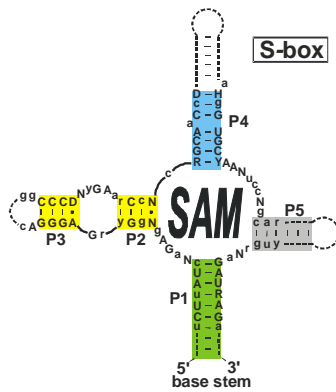

Supplement: gb-2004-5-11-r90-s1.pdf [file gb-2004-5-11-r90-s1.pdf]
